# Supplementary material
Source: MDPI journal article supplement (https://www.mdpi.com/2073-4352/11/9/1134)
Supplement: s1 [file s1]

## Article

# Effect of Graphene on Ice Polymorph

Chuanbao Zheng <sup>1,2,†</sup>, Hao Lu <sup>1,†</sup>, Quanming Xu <sup>1</sup>, Tianyi Liu <sup>1</sup>, Aniruddha Patil <sup>1</sup>, Jianyang Wu <sup>1</sup>, Renko de Vries <sup>2</sup>, Han Zuilhof <sup>3,4</sup> and Zhisen Zhang <sup>1,\*</sup>

<sup>1</sup> Department of Physics, Research Institute for Biomimetics and Soft Matter, Fujian Provincial Key Laboratory for Soft Functional Materials Research, Xiamen University, Xiamen 361005, China; chuanbao.zheng@wur.nl (C.Z.); luhao@stu.xmu.edu.cn (H.L.); 19820181154096@stu.xmu.edu.cn (Q.X.); 19820191152993@stu.xmu.edu.cn (T.L.); aniruddhapatil135@mdcollege.in (A.P.); jianyang@xmu.edu.cn (J.W.)

<sup>2</sup> Physical Chemistry and Soft Matter, Wageningen University & Research, Stippeneng 4, 6708 WE Wageningen, The Netherlands; renko.devries@wur.nl

<sup>3</sup> Laboratory of Organic Chemistry, Wageningen University & Research, 6708 WE Wageningen, The Netherlands; han.zuilhof@wur.nl

<sup>4</sup> Department of Chemical and Materials Engineering, Faculty of Engineering, King Abdulaziz University, Jeddah 21589, Saudi Arabia

\* Correspondence: zhangzs@xmu.edu.cn

† C.Z. and H.L. contributed equally to this manuscript.

**Table S1.** Cubicity of the nucleation stage in each simulation trajectory.

| Substrate      | Graphene | O-Haeckelite | R-Haeckelite | Random | Homo |
|----------------|----------|--------------|--------------|--------|------|
| Ice nucleation | 25.7     | 37.3         | 41.8         | 37.0   | 51.6 |
|                | 20.0     | 54.4         | 28.8         | 60.9   | 52.7 |
|                | 7.1      | 49.3         | 66.5         | 6.9    | 58.3 |
|                | 24.5     | 24.9         | 39.9         | 69.7   | 35.6 |
|                | 54.6     | 26.4         | 11.9         | 38.2   | 61.2 |
|                | 30.7     | 48.4         | 56.1         | 48.4   | 55.0 |
|                | 34.1     | 32.5         | 36.7         | 31.4   | 62.3 |
|                | 46.9     | 43.5         | 70.2         | 58.8   | 52.6 |
|                | 62.2     | 51.6         | 44.7         | 72.3   | 44.7 |
|                | 37.5     | 53.5         | 50.2         | 39.0   | 58.7 |
|                | 49.3     | 46.9         | 48.4         | 63.2   | 44.5 |
|                | 29.0     | 34.4         | 8.5          | 26.1   | 53.7 |
|                | 32.1     | 11.3         | 54.0         | 38.2   | 42.4 |
|                | 5.0      | 32.2         | 65.0         | 50.7   | 51.0 |
|                | 26.6     | 30.7         | 45.1         | 57.9   | 57.4 |
|                | 27.6     | 51.5         | 30.2         | 66.6   | 58.0 |
|                | 39.3     | 64.5         | 17.1         | 31.2   | 58.8 |
|                | 27.8     | 35.7         | 40.2         | 57.4   | 47.2 |
|                | 2.7      | 28.2         | 37.7         | 51.3   | 56.4 |
|                | 18.9     | 50.0         | 20.7         | 35.8   | 45.8 |
| Cubicity / %   | 13.0     | 49.5         | 41.8         | 37.6   | 49.3 |
|                | 22.8     | 43.1         | 63.7         | 23.4   | 55.6 |
|                | 16.2     | 57.3         | 36.2         | 61.2   | 54.9 |
|                | 35.8     | 37.1         | 37.1         | 42.0   | 55.6 |
|                | 14.1     | 39.5         | 38.7         | 27.7   | 63.4 |

|                     |                 |                     |                     |               |             |
|---------------------|-----------------|---------------------|---------------------|---------------|-------------|
|                     | 34.7            | 41.2                | 20.3                | 37.2          | 29.7        |
|                     | 35.0            | 53.7                | 42.4                | 57.6          | 69.5        |
|                     | 41.7            | 59.9                | 66.3                | 28.5          | 57.9        |
|                     | 22.9            | 44.5                | 50.2                | 54.5          | 37.9        |
|                     | 7.5             | 31.9                | 32.1                | 31.3          | 56.1        |
|                     | 33.8            | 34.8                | 39.4                | 50.5          | 50.5        |
|                     | 52.0            | 56.1                | 51.1                | 16.3          | 53.1        |
|                     | 54.8            | 38.8                | 38.2                | 46.9          | 61.1        |
|                     | 5.1             | 22.0                | 40.8                | 8.4           | 52.5        |
|                     | 3.3             | 47.8                | 39.0                | 22.5          | 47.0        |
|                     | 50.5            | 35.8                | 53.1                | 18.2          | 60.5        |
|                     | 49.9            | 21.7                | 45.6                | 9.3           | 56.4        |
|                     | 10.2            | 54.7                | 60.0                | 62.5          | 57.5        |
|                     | 8.8             | 47.4                | 61.2                | 65.5          | 33.1        |
|                     | 23.3            | 22.5                | 44.8                | 60.9          | 51.7        |
| <b>Substrate</b>    | <b>Graphene</b> | <b>O-Haeckelite</b> | <b>R-Haeckelite</b> | <b>Random</b> | <b>Homo</b> |
| <b>Freezing</b>     | 53.9            | 64.6                | 65.2                | 59.9          | 54.6        |
| <b>Completely</b>   | 68.1            | 43.0                | 52.0                | 67.9          | 62.5        |
|                     | 60.9            | 47.6                | 69.4                | 32.3          | 59.9        |
|                     | 54.9            | 55.6                | 55.7                | 61.4          | 64.8        |
|                     | 72.1            | 55.4                | 53.4                | 58.7          | 49.1        |
|                     | 46.2            | 56.9                | 50.4                | 53.1          | 65.1        |
|                     | 63.9            | 60.8                | 66.4                | 52.4          | 65.6        |
|                     | 49.0            | 59.7                | 73.9                | 66.7          | 61.3        |
|                     | 44.8            | 47.3                | 70.2                | 58.8          | 63.3        |
|                     | 30.2            | 41.4                | 59.4                | 50.7          | 55.9        |
|                     | 57.7            | 75.6                | 57.3                | 42.8          | 63.4        |
|                     | 47.3            | 36.6                | 50.8                | 54.3          | 58.8        |
|                     | 62.4            | 66.9                | 51.7                | 56.6          | 56.0        |
|                     | 48.6            | 45.8                | 51.6                | 58.2          | 63.9        |
|                     | 36.0            | 48.6                | 26.0                | 55.2          | 62.1        |
|                     | 61.9            | 52.5                | 45.9                | 53.5          | 61.1        |
|                     | 70.6            | 63.2                | 66.9                | 48.1          | 57.8        |
|                     | 59.2            | 47.3                | 52.7                | 67.0          | 57.5        |
|                     | 27.6            | 51.3                | 58.1                | 52.8          | 57.3        |
| <b>Cubicity / %</b> | 45.8            | 52.6                | 47.4                | 35.4          | 57.2        |
|                     | 73.2            | 67.7                | 66.6                | 72.4          | 54.5        |
|                     | 52.5            | 68.6                | 68.2                | 48.6          | 51.7        |
|                     | 60.2            | 65.4                | 65.0                | 66.2          | 63.9        |
|                     | 63.6            | 39.1                | 56.3                | 68.6          | 57.9        |
|                     | 26.1            | 59.9                | 42.9                | 51.1          | 54.2        |
|                     | 66.1            | 76.3                | 56.2                | 33.3          | 61.9        |

---

|      |      |      |      |      |
|------|------|------|------|------|
| 64.6 | 60.9 | 63.3 | 63.0 | 55.3 |
| 44.2 | 45.8 | 59.1 | 39.2 | 60.3 |
| 45.3 | 53.6 | 70.8 | 59.5 | 57.1 |
| 46.0 | 56.3 | 56.1 | 54.7 | 55.3 |
| 57.2 | 62.8 | 38.7 | 71.6 | 55.9 |
| 38.4 | 52.4 | 61.2 | 43.5 | 60.3 |
| 52.0 | 44.8 | 62.7 | 42.7 | 57.9 |
| 56.8 | 56.9 | 58.7 | 32.7 | 57.3 |
| 51.0 | 55.8 | 49.6 | 59.7 | 54.5 |
| 50.2 | 62.8 | 47.9 | 57.3 | 59.4 |
| 42.0 | 53.7 | 58.5 | 67.2 | 46.1 |
| 67.1 | 47.6 | 60.3 | 56.3 | 57.2 |
| 57.3 | 47.2 | 52.8 | 70.0 | 54.3 |
| 60.0 | 62.0 | 40.8 | 57.4 | 54.6 |

---

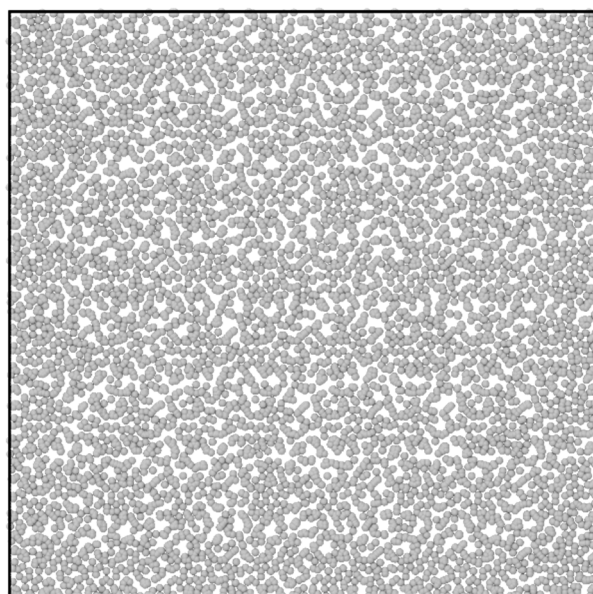

**Figure S1.** Surface morphology of 2-dimensional carbon substrate with all the carbon atoms randomly distributed, the *Random* system.

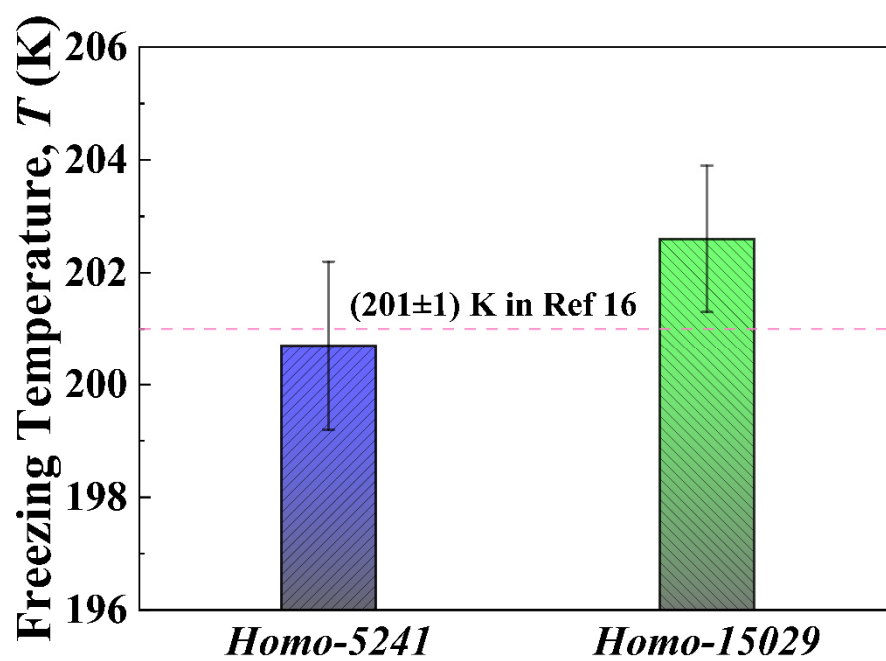

**Figure S2.** Freezing temperature in *Homo-5241* (5241 water molecules) and *Homo-15029* (15029 water molecules) systems by 20 independent MD trajectories.
